# Supplementary material for: f-treeGC: a questionnaire-based family tree-creation software for genetic counseling and genome cohort studies
Source: PubMed Central journal article supplement (PMC5512935; doi:10.1186/s12881-017-0433-4), 2017-07-14

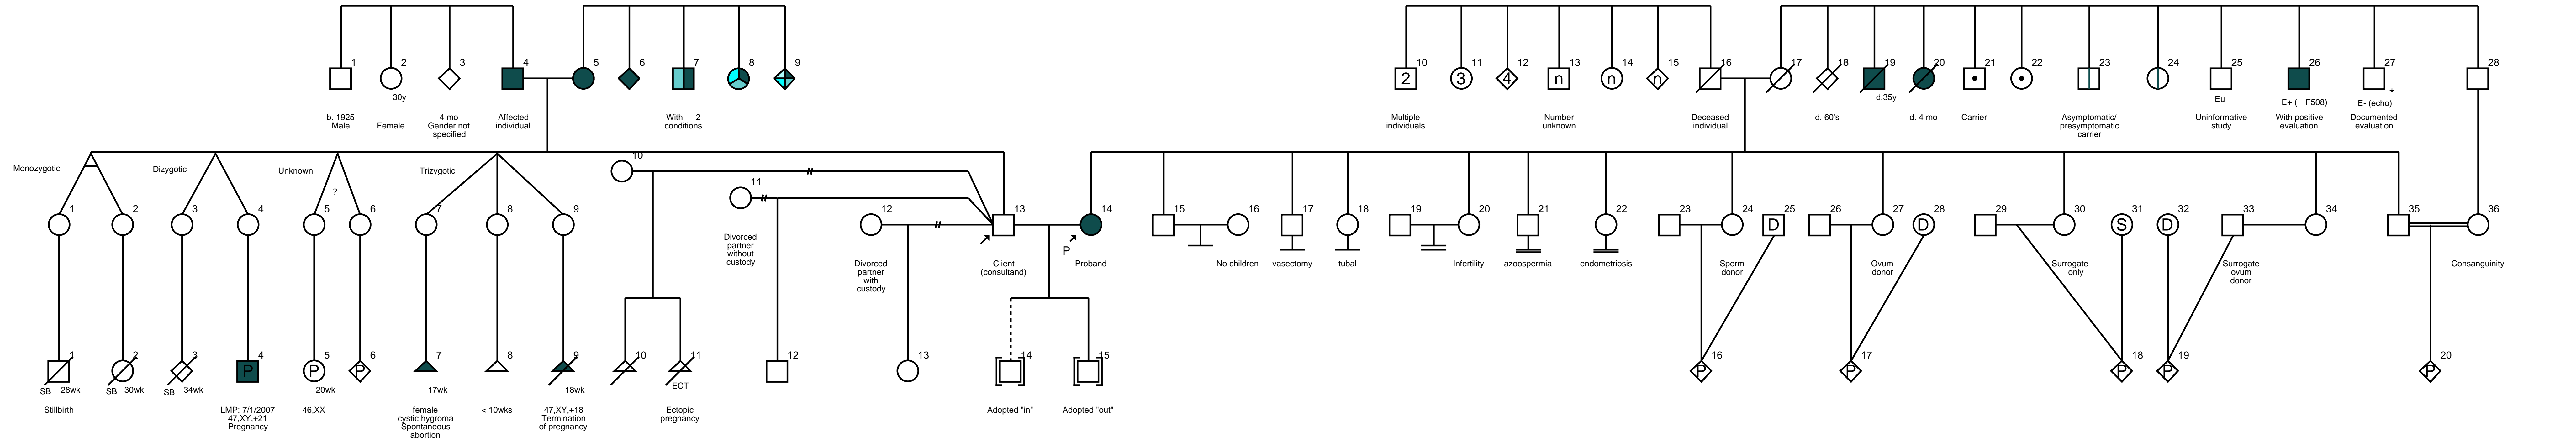

Supplement: 12881_2017_433_MOESM6_ESM.pdf [file 12881_2017_433_MOESM6_ESM.pdf]
